# Supplementary material for: Statins induce insulin-degrading enzyme secretion from astrocytes via an autophagy-based unconventional secretory pathway
Source: PubMed Central journal article supplement (PMC4628355; doi:10.1186/s13024-015-0054-3), 2015-10-31

Figure S4.

A

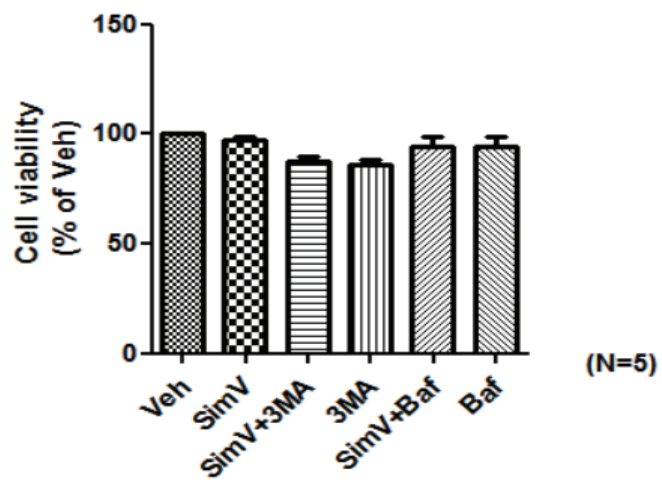

Supplement: 13024_2015_54_MOESM4_ESM.pdf [file 13024_2015_54_MOESM4_ESM.pdf]
